# Supplementary material
Source: PubMed Central journal article supplement (PMC6167607)
Supplement: brain-2016-02163-file008_awx143.pdf [file brain-2016-02163-file008_awx143.pdf]

# Supplementary Materials

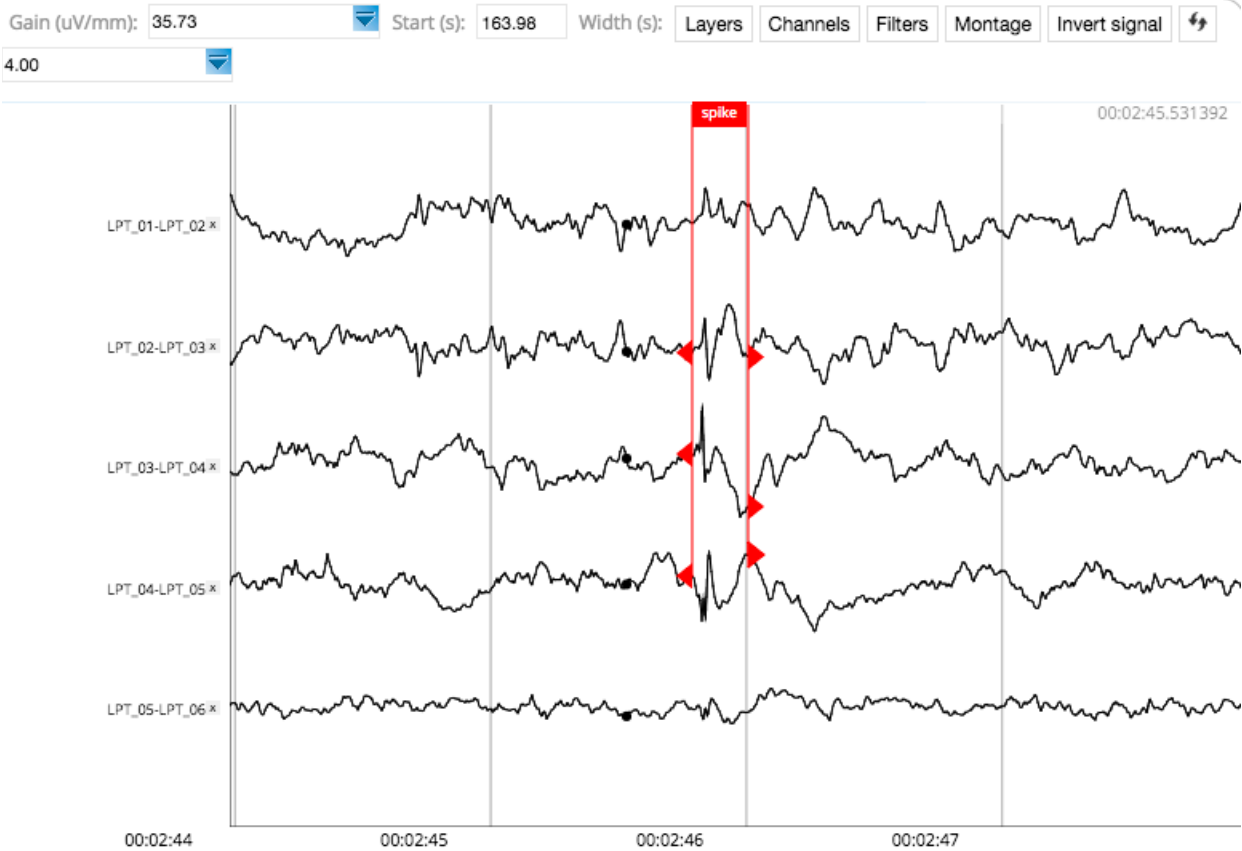

**Supplementary Fig. S1.** Example of detected spike on ieeg.org interface. Bipolar montage displayed.

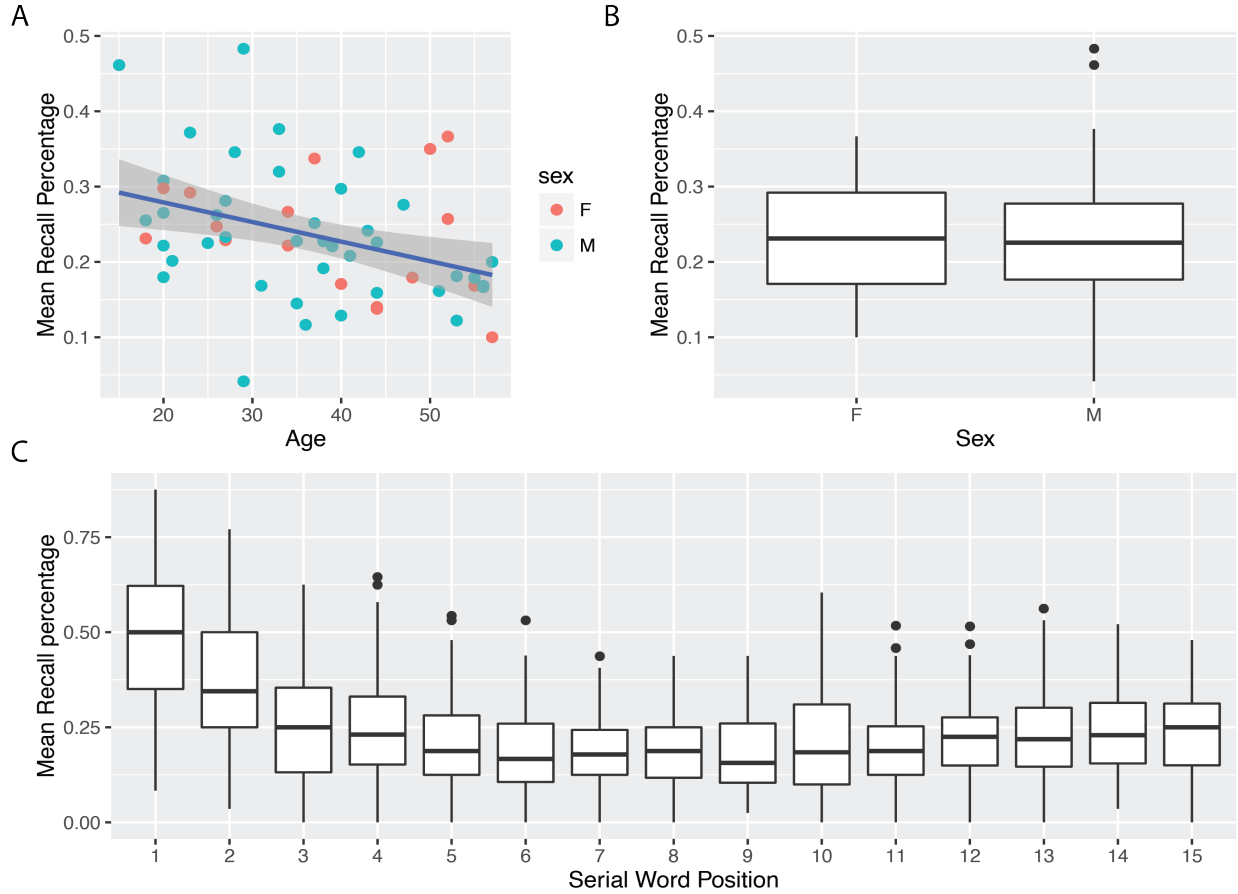

**Supplementary Fig. S2. Mean recall percentage by (A) age, (B) sex, and (C) serial word position.** Vertical axes represent the mean recall percentage across all plots. (A) Each point represents a patient with sex indicated by color. The horizontal axis indicates age. A best-fit line is plotted with a standard error ribbon. (B) Mean recall by sex; boxplots indicate median, 25<sup>th</sup>, and 75<sup>th</sup> percentiles. (C) The horizontal axis indicates the serial word position, where position one is the first word presented in a given trial.

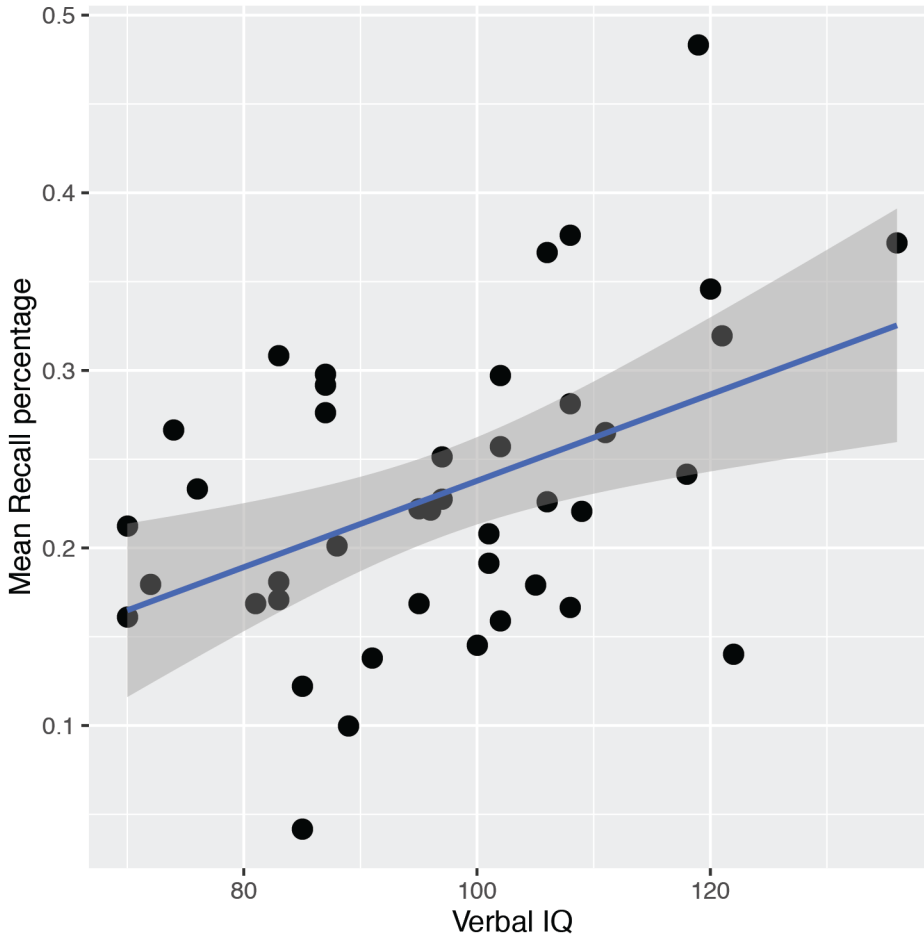

**Supplementary Fig. S3.** Mean recall percentage versus verbal IQ. Each marker represents a patient for which Verbal IQ was available. A best-fit line is plotted with a standard error ribbon ( $b = 0.00243$ ,  $t(40) = 3.133$ ,  $p = 0.003$ ,  $R^2_{\{adj\}} = 0.177$ ).

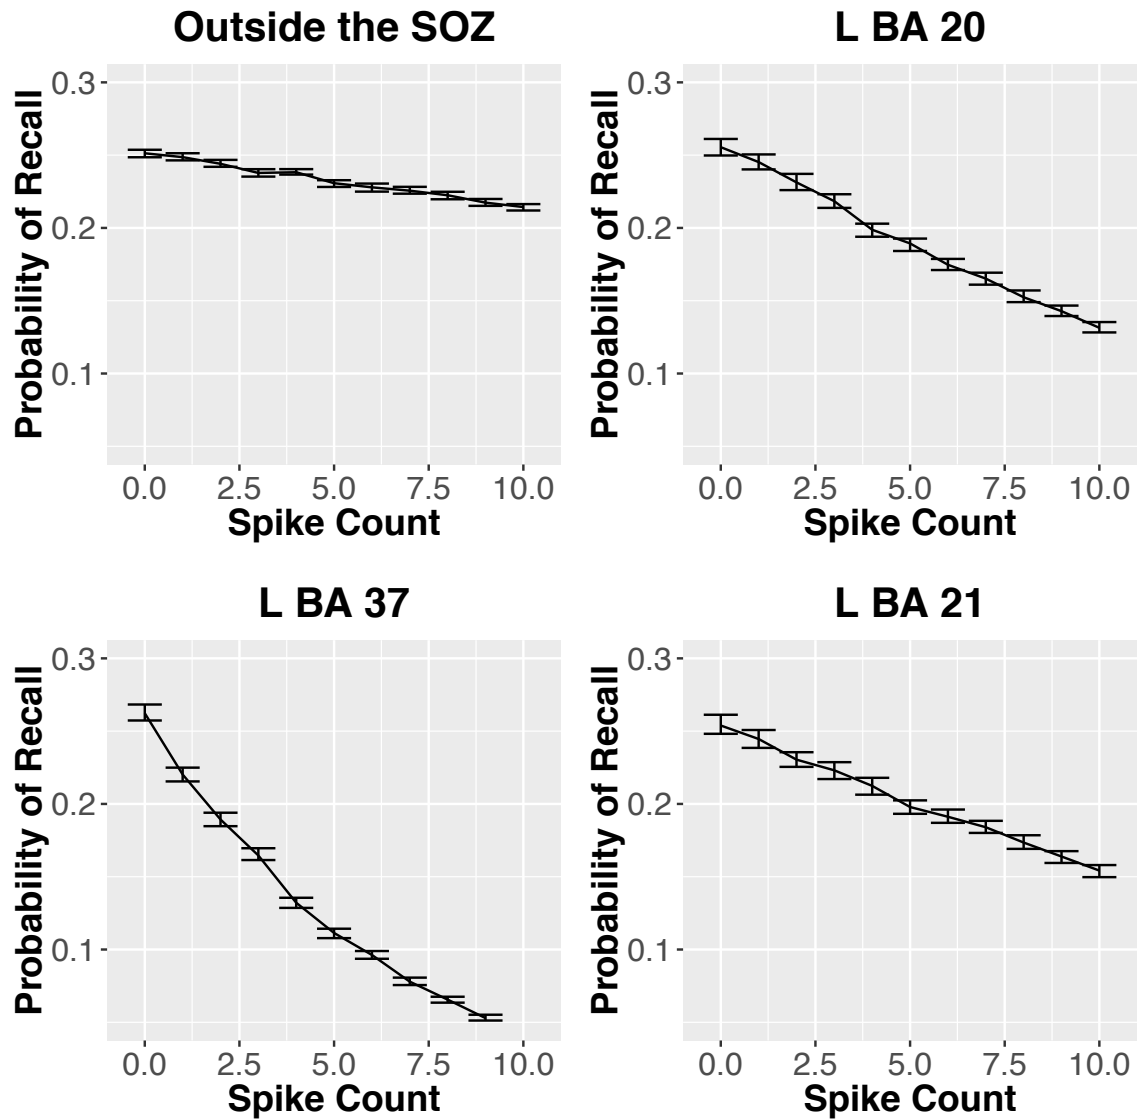

**Supplementary Fig. S4. Predicted probability of recall per spike during the encoding period.** The vertical axis indicates the probability of recall for a given word presentation. The horizontal axis indicates the spike count in a given region for a given word presentation. The predicted probabilities and 95% confidence interval are plotted, which are derived from predictions from 100 bootstrapped samples of 1000 word presentations.

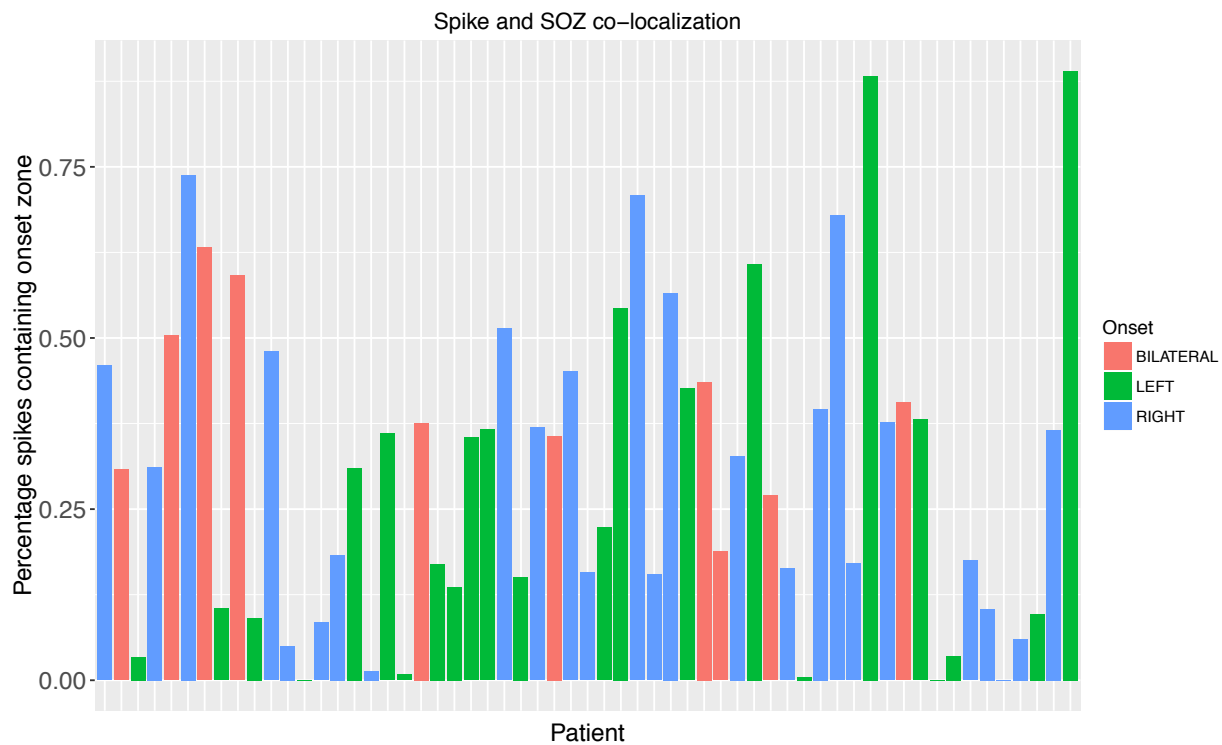

**Supplementary Fig. S5. Percent of spikes overriding the seizure onset zone for each patient.** Horizontal axis denotes each patient, colored by seizure onset lateralization. The vertical axis denotes the percentage of spikes in all sessions that involve the seizure onset zone.

**Supplementary Table S1. Patient demographics and experimental information.**

| Pt | Hospital | Age | Sex | Lateralization | Onset                   | Sessions | Mean Recall % |
|----|----------|-----|-----|----------------|-------------------------|----------|---------------|
| 1  | HUP      | 38  | M   | RIGHT          | R Temporal              | 5        | 0.23          |
| 2  | HUP      | 20  | M   | BILATERAL      | B Temporal              | 2        | 0.18          |
| 3  | HUP      | 36  | M   | LEFT           | L Temporal              | 6        | 0.12          |
| 4  | HUP      | 25  | M   | RIGHT          | R Limbic                | 4        | 0.23          |
| 5  | HUP      | 18  | F   | BILATERAL      | B Limbic, R Temporal    | 3        | 0.23          |
| 6  | HUP      | 27  | F   | RIGHT          | R Limbic, R Temporal    | 2        | 0.23          |
| 7  | HUP      | 55  | F   | BILATERAL      | B Limbic                | 2        | 0.17          |
| 8  | HUP      | 18  | M   | UNLOCALIZED    |                         | 3        | 0.35          |
| 9  | HUP      | 38  | F   | UNLOCALIZED    |                         | 1        | 0.20          |
| 10 | HUP      | 40  | M   | LEFT           | L Temporal, L Occipital | 4        | 0.30          |
| 11 | HUP      | 27  | M   | BILATERAL      | B Temporal              | 2        | 0.28          |
| 12 | HUP      | 20  | M   | LEFT           | L Frontal               | 4        | 0.22          |
| 13 | HUP      | 37  | M   | RIGHT          | R Temporal              | 3        | 0.25          |
| 14 | HUP      | 42  | M   | RIGHT          | R Occipital             | 2        | 0.35          |
| 15 | HUP      | 30  | F   | LEFT           | L Frontal               | 3        | 0.21          |
| 16 | HUP      | 40  | M   | RIGHT          | R Frontal               | 1        | 0.13          |
| 17 | TJUH     | 25  | M   | UNLOCALIZED    |                         | 3        | 0.32          |
| 18 | TJUH     | 40  | F   | RIGHT          | R Temporal, R Limbic    | 4        | 0.17          |
| 19 | TJUH     | 39  | M   | LEFT           | L Limbic                | 1        | 0.22          |
| 20 | TJUH     | 34  | F   | RIGHT          | R Temporal              | 10       | 0.22          |
| 21 | TJUH     | 44  | M   | LEFT           | L Temporal              | 1        | 0.16          |
| 22 | TJUH     | 29  | M   | LEFT           | L Central               | 1        | 0.04          |
| 23 | TJUH     | 43  | M   | BILATERAL      | B Temporal              | 4        | 0.24          |
| 24 | TJUH     | 21  | M   | LEFT           | L Frontal               | 3        | 0.20          |
| 25 | TJUH     | 56  | M   | LEFT           | L Temporal              | 3        | 0.17          |
| 26 | TJUH     | 57  | F   | LEFT           | L Temporal, L Limbic    | 3        | 0.10          |
| 27 | TJUH     | 20  | M   | LEFT           | L Frontal               | 3        | 0.27          |
| 28 | TJUH     | 41  | M   | RIGHT          | R Temporal              | 2        | 0.21          |
| 29 | TJUH     | 34  | F   | LEFT           | L Temporal              | 4        | 0.27          |
| 30 | TJUH     | 52  | F   | RIGHT          | R Temporal              | 1        | 0.37          |
| 31 | TJUH     | 44  | M   | UNLOCALIZED    |                         | 3        | 0.45          |
| 32 | TJUH     | 44  | F   | BILATERAL      | B Temporal              | 4        | 0.14          |
| 33 | TJUH     | 33  | M   | RIGHT          | R Frontal               | 4        | 0.32          |
| 34 | TJUH     | 23  | F   | RIGHT          | R Temporal              | 5        | 0.29          |
| 35 | TJUH     | 50  | F   | UNLOCALIZED    |                         | 2        | 0.35          |
| 36 | TJUH     | 33  | M   | LEFT           | L Temporal              | 3        | 0.38          |
| 37 | TJUH     | 44  | M   | LEFT           | L Temporal              | 4        | 0.23          |
| 38 | TJUH     | 15  | M   | RIGHT          | R Occipital, R Temporal | 4        | 0.46          |
| 39 | TJUH     | 23  | M   | RIGHT          | R Temporal, R Frontal   | 4        | 0.37          |

|    |      |    |   |             |                       |    |      |
|----|------|----|---|-------------|-----------------------|----|------|
| 40 | TJUH | 53 | M | RIGHT       | R Temporal, R Limbic  | 2  | 0.12 |
| 41 | TJUH | 53 | M | LEFT        | L Temporal            | 2  | 0.18 |
| 42 | TJUH | 29 | M | BILATERAL   | B Temporal            | 2  | 0.48 |
| 43 | TJUH | 35 | M | BILATERAL   | B Temporal            | 3  | 0.23 |
| 44 | TJUH | 48 | F | RIGHT       | R Frontal, R Temporal | 8  | 0.18 |
| 45 | TJUH | 20 | F | UNLOCALIZED |                       | 15 | 0.44 |
| 46 | TJUH | 35 | M | LEFT        | L Temporal, L Frontal | 3  | 0.15 |
| 47 | TJUH | 20 | M | BILATERAL   | L frontal, R Temporal | 9  | 0.31 |
| 48 | TJUH | 52 | F | RIGHT       | R Temporal            | 3  | 0.26 |
| 49 | TJUH | 26 | F | LEFT        | L Frontal             | 3  | 0.25 |
| 50 | TJUH | 20 | F | RIGHT       | R Temporal, R Frontal | 2  | 0.30 |
| 51 | TJUH | 31 | M | RIGHT       | R Temporal, R Frontal | 2  | 0.17 |
| 52 | TJUH | 50 | M | UNLOCALIZED |                       | 3  | 0.21 |
| 53 | TJUH | 18 | M | RIGHT       | R Temporal            | 3  | 0.26 |
| 54 | TJUH | 44 | F | LEFT        | L Temporal            | 2  | 0.14 |
| 55 | TJUH | 28 | M | RIGHT       | R Temporal            | 3  | 0.35 |
| 56 | TJUH | 51 | M | BILATERAL   | B Temporal            | 5  | 0.16 |
| 57 | TJUH | 38 | M | LEFT        | L Temporal            | 1  | 0.19 |
| 58 | TJUH | 26 | F | LEFT        | L Frontal             | 3  | 0.12 |
| 59 | TJUH | 56 | M | LEFT        | L Temporal            | 2  | 0.17 |
| 60 | TJUH | 47 | M | RIGHT       | R Temporal            | 1  | 0.28 |
| 61 | TJUH | 26 | M | RIGHT       | R Frontal             | 3  | 0.26 |
| 62 | TJUH | 25 | M | RIGHT       | R Frontal             | 1  | 0.21 |
| 63 | TJUH | 27 | M | RIGHT       | R Frontal             | 1  | 0.23 |
| 64 | TJUH | 20 | F | UNLOCALIZED |                       | 3  | 0.42 |
| 65 | TJUH | 55 | M | LEFT        | L Frontal             | 1  | 0.18 |
| 66 | TJUH | 37 | F | RIGHT       | R Frontal             | 3  | 0.34 |
| 67 | TJUH | 57 | M | LEFT        | L Temporal            | 2  | 0.20 |

**Supplementary Table S2. Model construction - Encoding**

|   | Fixed                                                              | Random  | Testing        | $\chi^2(1)$ | p      |
|---|--------------------------------------------------------------------|---------|----------------|-------------|--------|
| 1 |                                                                    | Patient | Word order     | 378.73      | <0.001 |
| 2 | Word order                                                         | Patient | Age            | 9.93        | 0.0016 |
| 3 | Word order + Age                                                   | Patient | Sex            | <0.001      | 0.99   |
| 4 | Word order + Age                                                   | Patient | Session (Nest) | 109.55      | <0.001 |
| 5 | Word order + Age                                                   | Patient | Verbal IQ      | 8.0952      | 0.004  |
| 6 | Model: recalled ~ word_order + age + verbal_iq + 1 patient/session |         |                |             |        |

In each iteration, a null model is compared to an alternative model to test one additional variable through the likelihood ratio test. If the alternative model fits the data better, it is retained. Spike counts are added to the final model (5) and tested in subsequent analyses.

**Supplementary Table S3. Regional analysis of patients with right lateralized seizure onset zones.**

| N  | L/R | Region                     |             | Odds [95% CI]       | $\chi^2(1)$ | P (unadj) |
|----|-----|----------------------------|-------------|---------------------|-------------|-----------|
| 21 | R   | Hippocampus                | Hippocampus | 0.943 [.879 1.011]  | 7.49        | 0.187     |
| 25 | R   | Superior<br>Temporal Gyrus | BA 38       | 0.988 [.943 1.034]  | 3.67        | 0.596     |
| 21 | R   | Superior<br>Temporal Gyrus | BA 22       | 0.971 [.910 1.035]  | 3.11        | 0.683     |
| 24 | R   | Inferior<br>Temporal Gyrus | BA 20       | 0.970 [.934 1.007]  | 3.09        | 0.686     |
| 22 | R   | Fusiform Gyrus             | BA 37       | 1.046 [.989 1.106]  | 2.68        | 0.748     |
| 28 | R   | Peristriate cortex         | BA 19       | 0.967 [.904 1.035]  | 2.32        | 0.803     |
| 28 | R   | Middle<br>Temporal Gyrus   | BA 21       | 0.982 [.939, 1.028] | 1.99        | 0.851     |

Regional analysis was performed separately for each region for only right lateralized patients. P values are unadjusted.



**Supplementary Table S4. Model construction - Retrieval**

|   | Fixed                                                   | Random  | Testing        | $\chi^2(1)$ | p      |
|---|---------------------------------------------------------|---------|----------------|-------------|--------|
| 1 |                                                         | Patient | Word order     | 384.87      | <0.001 |
| 2 | Word order                                              | Patient | Age            | 4.23        | 0.0397 |
| 3 | Word order + Age                                        | Patient | Sex            | 3.786       | 0.1507 |
| 4 | Word order + Age                                        | Patient | Session (Nest) | 566.23      | <0.001 |
| 5 | Word order + Age                                        | Patient | Verbal IQ      | 0.0575      | 0.8105 |
| 6 | Model: retrieved ~ word_order + age + 1 patient/session |         |                |             |        |

In each iteration, a null model is compared to an alternative model to test one additional variable through the likelihood ratio test. If the alternative model fits the data better, it is retained. Spike counts are added to the final model (5) and tested in subsequent analyses.

## Model Details

We model recall success as a binomial distribution represented by parameter  $\pi_{ij}$ , indicating the probability of successful recall on word  $i$  for subject  $j$  given our parameters  $\beta$

$$y|\pi_{ijk} \sim \text{Binomial}(1, \pi_{ijk})$$
$$\pi_{ijk} = P(y_{ijk} = 1|\beta)$$

Using maximum likelihood, we estimate  $\beta$  with a logistic generalized linear mixed model . With a logit link function, we predict the log odds as a function of our fixed effects as well as our random effects. We use a nested random effects model to account for variability in baseline recall rates for each person and, within each person, variability between sessions. Below,  $b_j$  codes for the mean recall rate for subject  $j$ , session  $k$ , and  $a_{k(j)}$  codes for variation in recall rates for each session  $k$  within subject  $j$ .

$$\log\left(\frac{\pi_{ijk}}{1 - \pi_{ijk}}\right) = \beta_1 \text{age}_j + \beta_2 \text{verbal}_{iq_i} + \beta_2 \text{word}_{order_i} + \beta_3 \text{spike}_{count_{ijk}}$$
$$+ b_j + a_{k(j)}$$
$$b_j \sim N(0, \sigma^2), a_{k(j)} \sim N(0, \tau_j^2)$$

The GLMM was estimated using R statistical software<sup>1,2</sup>. For better interpretation, odds ( $\exp(\beta)$ ) are reported with 95% confidence intervals calculated with the profile likelihood method, which makes fewer assumptions about normality. For regional analysis, p values are determined using the likelihood ratio test, which compares the difference between likelihood of a null model to an alternative model with the corresponding region.

## References

1. Bates D, Maechler M, Bolker B, et al. Package lme4. J Stat Softw. 2015;67:1–91.
2. R Development Core Team. R: A Language and Environment for Statistical Computing. R Foundation for Statistical Computing Vienna Austria. 2015. p. {ISBN} 3–900051 – 07–0.
